# Supplementary material
Source: PubMed Central journal article supplement (PMC4173103)
Supplement: supp_kxu015_kxu015supp.pdf [file supp_kxu015_kxu015supp.pdf]

# Supplementary materials to “Standard error estimation in the EM algorithm when joint modeling of survival and longitudinal data”

Cong Xu, Paul Baines and Jane-Ling Wang\*

*Department of Statistics, University of California, Davis, California 95616, U.S.A*

jlwang.ucdavis@gmail.com

## APPENDIX

### A.1 Computation of $I_{oc}$

Denote the ordered uncensored event times by  $U^1 < U^2 < \dots < U^K$  and the corresponding jump sizes of the cumulative baseline hazard function by  $\Lambda^1, \Lambda^2, \dots, \Lambda^K$ . Consider the complete-data log-likelihood:

$$\begin{aligned} \ell_n(\boldsymbol{\eta}|\mathbf{C}) = & -\frac{N}{2} \log(2\pi\sigma_e^2) - \frac{\sum_i \sum_j (Y_{ij} - \mathbf{X}_{ij}^\top \boldsymbol{\beta} - \mathbf{z}_{ij}^\top \mathbf{b}_i)^2}{2\sigma_e^2} \\ & + \sum_i \Delta_i [\log \lambda(V_i) + \mathbf{W}_i^\top(V_i) \boldsymbol{\gamma} + \alpha m_i(V_i)] \\ & - \sum_i \int_0^{V_i} \lambda(t) \exp\{\mathbf{W}_i^\top(t) \boldsymbol{\gamma} + \alpha m_i(t)\} dt \\ & - \frac{n}{2} \log(|2\pi \Sigma_b|) - \frac{1}{2} \sum_i \mathbf{b}_i^\top \Sigma_b^{-1} \mathbf{b}_i. \end{aligned} \tag{A.1.1}$$

Take the derivative of  $\ell_n(\boldsymbol{\eta}|\mathbf{C})$  w.r.t.  $\Lambda^k$ :

$$\frac{\partial \ell_n(\boldsymbol{\eta}|\mathbf{C})}{\partial \Lambda^k} = \frac{\sum_i \Delta_i I(V_i = U^k)}{\Lambda^k} - \sum_i I(V_i \geq U^k) \exp\{\mathbf{W}_i^\top(U^k) \boldsymbol{\gamma} + \alpha m_i(U^k)\},$$

\*To whom correspondence should be addressed.

therefore,

$$\frac{\partial \ell_n(\boldsymbol{\eta}|\mathbf{C})}{\partial \Lambda^k} = 0 \implies \hat{\Lambda}^k(\boldsymbol{\theta}) = \frac{\sum_i \Delta_i I(V_i = U^k)}{\sum_i I(V_i \geq U^k) \exp\{\mathbf{W}_i^\top(U^k)\boldsymbol{\gamma} + \alpha m_i(U^k)\}}.$$

Let  $\dot{\ell}_n(\boldsymbol{\theta}) = \frac{\partial \ell_n(\boldsymbol{\eta}|\mathbf{C})}{\partial \boldsymbol{\theta}}|_{\Lambda^k = \hat{\Lambda}^k(\boldsymbol{\theta})}$ , then  $I_{oc} = E\left[-\frac{\partial^2 \ell_n(\boldsymbol{\eta}|\mathbf{C})}{\partial \boldsymbol{\theta} \cdot \partial \boldsymbol{\theta}}|_{\mathbf{O}, \boldsymbol{\eta}^*}\right]$  is a  $p \times p$  ( $p$  is the length of the finite dimensional parameter  $\boldsymbol{\theta}$ ) matrix with  $\frac{\partial^2 \ell_n(\boldsymbol{\eta}|\mathbf{C})}{\partial \boldsymbol{\theta} \cdot \partial \boldsymbol{\theta}}$  substituted by  $\frac{\partial \dot{\ell}_n(\boldsymbol{\theta})}{\partial \boldsymbol{\theta}}$ .

### A.2 Computation of $D^{10}Q_{\boldsymbol{\theta}}(\boldsymbol{\eta}', \boldsymbol{\eta})$ and $S_{\boldsymbol{\theta}}(\boldsymbol{\eta})$

The Q function is given in (2.6) of the paper and the  $D^{10}Q$  function before profiling is

$$D^{10}Q(\boldsymbol{\eta}', \boldsymbol{\eta}) = \frac{\partial E[\log f_n(\boldsymbol{\eta}'|\mathbf{C})|\mathbf{O}, \boldsymbol{\eta}]}{\partial \boldsymbol{\eta}'} = \frac{\partial E[\ell_n(\boldsymbol{\eta}'|\mathbf{C})|\mathbf{O}, \boldsymbol{\eta}]}{\partial \boldsymbol{\eta}'}.$$

From (A.1.1) we obtain:

$$\frac{\partial Q(\boldsymbol{\eta}', \boldsymbol{\eta})}{\partial \Lambda^{k'}} = \frac{\sum_i \Delta_i I(V_i = U^k)}{\Lambda^{k'}} - \sum_i I(V_i \geq U^k) E[\exp\{\mathbf{W}_i^\top(U^k)\boldsymbol{\gamma}' + \alpha' m_i(U^k)\}|\mathbf{O}, \boldsymbol{\eta}],$$

and

$$\frac{\partial Q(\boldsymbol{\eta}', \boldsymbol{\eta})}{\partial \Lambda^{k'}} = 0 \implies \hat{\Lambda}^k(\boldsymbol{\theta}') = \frac{\sum_i \Delta_i I(V_i = U^k)}{\sum_i I(V_i \geq U^k) E[\exp\{\mathbf{W}_i^\top(U^k)\boldsymbol{\gamma}' + \alpha' m_i(U^k)\}|\mathbf{O}, \boldsymbol{\eta}]}.$$

Then the profile version of the  $D^{10}Q$  function is defined as

$$D^{10}Q_{\boldsymbol{\theta}}(\boldsymbol{\eta}', \boldsymbol{\eta}) = \frac{\partial E[\ell_n(\boldsymbol{\eta}'|\mathbf{C})|\mathbf{O}, \boldsymbol{\eta}]}{\partial \boldsymbol{\theta}'}|_{\Lambda^{k'} = \hat{\Lambda}^k(\boldsymbol{\theta}'),}$$

which is a vector of length  $p$  instead of length  $p + n_u$  ( $n_u$  is the number of uncensored survival time points). The corresponding S function is naturally  $S_{\boldsymbol{\theta}}(\boldsymbol{\eta}) = D^{10}Q_{\boldsymbol{\theta}}(\boldsymbol{\eta}', \boldsymbol{\eta})|_{\boldsymbol{\eta}' = \boldsymbol{\eta}}$ .

### A.3 Additional simulation study

The following is another simulation study to examine the performance of different SE estimation procedures. Again, consider two time-independent covariates  $X_{1i}$  (from Bernoulli distribution with success probability 0.5) and  $X_{2i}$  (from  $\mathcal{N}(2, 0.4^2)$ ),  $i = 1, 2, \dots, n$ . The longitudinal model

is the same with that in Section 4.1:

$$Y_{ij} = Y_i(t_{ij}) = \beta_1 X_{1i} + \beta_2 X_{2i} + \beta_3 t_{ij} + \beta_4 X_{1i} t_{ij} + \beta_5 X_{2i} t_{ij} + b_{1i} + b_{2i} t_{ij} + e_{ij},$$

with  $\mathbf{b}_i = (b_{1i}, b_{2i})^\top \sim \mathcal{N}(0, \Sigma_b)$ ,  $e_{ij} \sim \mathcal{N}(0, \sigma_e^2)$  and  $t_{ij} = 0.2(j - 1)$  for  $i = 1, 2, \dots, n$ . The survival model only shares the same random effects with the longitudinal model:

$$\lambda(t|\mathbf{b}_i, X_{1i}, X_{2i}) = \lambda(t) \exp\{\gamma_1 X_{1i} + \gamma_2 X_{2i} + \gamma_3 X_{1i} t + \gamma_4 X_{2i} t + \alpha(b_{1i} + b_{2i} t)\}.$$

The true baseline hazard function is  $\lambda(t) \equiv 1$  and the true values of the parameters are chosen as below:

$$\begin{aligned} \beta_1 = 2.0, \beta_2 = -1.0, \beta_3 = 2.0, \beta_4 = -2.0, \beta_5 = 1.5, \sigma_e^2 = 0.1, \Sigma_b = \begin{pmatrix} 0.5 & -0.1 \\ -0.1 & 0.25 \end{pmatrix}, \\ \gamma_1 = -1.0, \gamma_2 = -1.5, \gamma_3 = 2, \gamma_4 = 1, \alpha = 0.5. \end{aligned}$$

Again, the simulation is repeated 500 times with sample size  $n = 200$ . The simulation results are presented in Table 3 below.

#### A.4 Comparison with the JM package

Both the piecewise constant and the spline-based approaches, as implemented in the R package “JM”, are examples of the method of sieves, where the sieve spaces are seemingly parametric after a proper sieve dimension has been selected. Hsieh *and others* (2013) discusses properties of the method of sieves approach in the context of joint modeling and the issue of sieves biases as the true baseline hazard function may not belong to the sieve spaces. Typically, a moderate or large number of parameters is needed to model the sieve space so the sieve bias can be contained. In this regard, the profiling method proposed in Section 3.2 and 3.3 can be useful for standard error estimation under such flexible hazard models where the number of parameters is large.

Table 4 below shows the results of our joint model with completely unspecified baseline hazard function along with those of the joint models with piecewise constant and spline-based baseline hazard functions fitted by the JM package, where the follow-up period is divided into 7 intervals

with knots placed at the corresponding quantiles. As illustrated by the table, comparing with the semiparametric joint model, the joint models with piecewise constant and spline-based baseline hazard yield satisfactory parameter estimates but the biases for  $\alpha$  are 0.02306 and 0.02803, respectively, which are 188% and 228% of 0.01229, the bias under our semiparametric approach. For the empirical standard errors (“MCSE”) and estimated standard errors (“Est. SE”), the results in Table 4 are somewhat unexpected as the semiparametric approach led to comparable standard errors as parametric ones. Thus, there is no disadvantage in using the semiparametric approach. This simulation also demonstrates that parametric approaches can provide good approximations but the bias in the estimates can be improved by a nonparametric approach.

#### *A.5 Another model for the HIV clinical trial data*

The following is another model fitted for the HIV clinical trial data: (results are given in Table 5 below)

$$Y_{ij} = m_i(t_{ij}) + e_{ij} = \beta_0 + \beta_1 t_{ij} + \beta_2 \text{drug}_i t_{ij} + b_{1i} + b_{2i} t_{ij} + e_{ij},$$

$$\lambda(t|\mathbf{b}_i, \text{drug}_i) = \lambda(t) \exp\{\gamma \text{drug}_i + \alpha m_i(t)\}.$$

#### ADDITIONAL TABLES

Additional tables for the simulation results in Section 4 are presented below.

#### REFERENCES

HSIEH, F., DING, J. AND WANG, J.L. (2013). Method of sieves to joint model survival and longitudinal data. *Statistica Sinica* **23**, 1181-1213.

Table 1. *Additional SE estimates for case I. The results for  $h = 10^{-3}, 10^{-4}$  are provided for the PFDM/PREM, PFDS/PRES and PL methods.*

| $\theta$   | MCSE    | PFDM<br>( $h = 10^{-3}$ ) | PREM<br>( $h = 10^{-3}$ ) | PFDS<br>( $h = 10^{-3}$ ) | PRES<br>( $h = 10^{-3}$ ) | PL<br>( $h = 10^{-3}$ ) |
|------------|---------|---------------------------|---------------------------|---------------------------|---------------------------|-------------------------|
| $\beta_1$  | 0.09939 | 0.09413                   | 0.09529                   | 0.09527                   | 0.09527                   | 0.09526                 |
| $\beta_2$  | 0.11760 | 0.11164                   | 0.11908                   | 0.11939                   | 0.11821                   | 0.11813                 |
| $\beta_3$  | 0.12354 | 0.12002                   | 0.12008                   | 0.12030                   | 0.11968                   | 0.11968                 |
| $\beta_4$  | 0.10917 | 0.11681                   | 0.11498                   | 0.11498                   | 0.11482                   | 0.11481                 |
| $\beta_5$  | 0.18441 | 0.19139                   | 0.18310                   | 0.18326                   | 0.18311                   | 0.18232                 |
| $\gamma_1$ | 0.24130 | 0.20559                   | 0.24144                   | 0.24677                   | 0.23849                   | 0.21644                 |
| $\gamma_2$ | 0.37139 | 0.30929                   | 0.35430                   | 0.36708                   | 0.35264                   | 0.30828                 |
| $\alpha$   | 0.13989 | 0.09840                   | 0.13595                   | 0.14233                   | 0.13585                   | 0.11895                 |
| N.         | Posit.  | 489                       | 500                       | 499                       | 500                       | 500                     |
| $\theta$   | MCSE    | PFDM<br>( $h = 10^{-4}$ ) | PREM<br>( $h = 10^{-4}$ ) | PFDS<br>( $h = 10^{-4}$ ) | PRES<br>( $h = 10^{-4}$ ) | PL<br>( $h = 10^{-4}$ ) |
| $\beta_1$  | 0.09939 | 0.09424                   | 0.09528                   | 0.09548                   | 0.09527                   | 0.09524                 |
| $\beta_2$  | 0.11760 | 0.11230                   | 0.11908                   | 0.11645                   | 0.11821                   | 0.11798                 |
| $\beta_3$  | 0.12354 | 0.11999                   | 0.12008                   | 0.11614                   | 0.11968                   | 0.11963                 |
| $\beta_4$  | 0.10917 | 0.11642                   | 0.11498                   | 0.11431                   | 0.11482                   | 0.11476                 |
| $\beta_5$  | 0.18441 | 0.19053                   | 0.18310                   | 0.17992                   | 0.18311                   | 0.18089                 |
| $\gamma_1$ | 0.24130 | 0.20895                   | 0.24144                   | 0.20139                   | 0.23849                   | 0.17305                 |
| $\gamma_2$ | 0.37139 | 0.31326                   | 0.35430                   | 0.26674                   | 0.35264                   | 0.21645                 |
| $\alpha$   | 0.13989 | 0.10335                   | 0.13595                   | 0.10198                   | 0.13585                   | 0.08609                 |
| N.         | Posit.  | 500                       | 500                       | 417                       | 500                       | 500                     |

Table 2. *Simulation results for case II in Section 4.1.*

| $\theta$          | $\beta_1$ | $\beta_2$ | $\beta_3$ | $\beta_4$ | $\beta_5$ | $\gamma_1$ | $\gamma_2$ | $\alpha$ | N.     |
|-------------------|-----------|-----------|-----------|-----------|-----------|------------|------------|----------|--------|
| $\theta_0$        | -1.0      | -1.5      | 1.0       | -0.5      | 0.5       | -0.5       | 1.5        | 0.5      | Posit. |
| Mean              | -0.99861  | -1.50279  | 1.00077   | -0.50080  | 0.49397   | -0.49678   | 1.54872    | 0.51314  |        |
| MCSE              | 0.10840   | 0.12984   | 0.15929   | 0.14415   | 0.23427   | 0.25420    | 0.37959    | 0.15970  |        |
| PFDM( $10^{-2}$ ) | 0.10465   | 0.13650   | 0.16131   | 0.14876   | 0.22435   | 0.30367    | 0.43448    | 0.20554  | 404    |
| PFDM( $10^{-3}$ ) | 0.10514   | 0.13443   | 0.15701   | 0.15742   | 0.23093   | 0.23320    | 0.32174    | 0.12332  | 317    |
| PFDM( $10^{-4}$ ) | 0.10474   | 0.13399   | 0.15334   | 0.15719   | 0.23241   | 0.20654    | 0.29096    | 0.09787  | 354    |
| PFDM( $10^{-5}$ ) | 0.10473   | 0.13389   | 0.15256   | 0.15666   | 0.23333   | 0.20587    | 0.28974    | 0.09733  | 366    |
| PREM( $10^{-2}$ ) | 0.10469   | 0.13186   | 0.15498   | 0.15168   | 0.23170   | 0.25054    | 0.36675    | 0.15421  | 500    |
| PREM( $10^{-3}$ ) | 0.10469   | 0.13186   | 0.15499   | 0.15168   | 0.23171   | 0.25054    | 0.36675    | 0.15421  | 500    |
| PREM( $10^{-4}$ ) | 0.10469   | 0.13186   | 0.15499   | 0.15168   | 0.23171   | 0.25054    | 0.36675    | 0.15421  | 500    |
| PREM( $10^{-5}$ ) | 0.10469   | 0.13186   | 0.15499   | 0.15168   | 0.23171   | 0.25054    | 0.36675    | 0.15421  | 500    |
| PFDS( $10^{-2}$ ) | 0.10458   | 0.13188   | 0.15512   | 0.15151   | 0.23126   | 0.25094    | 0.36670    | 0.15062  | 500    |
| PFDS( $10^{-3}$ ) | 0.10457   | 0.13217   | 0.15570   | 0.15141   | 0.23165   | 0.25899    | 0.37874    | 0.15739  | 497    |
| PFDS( $10^{-4}$ ) | 0.10489   | 0.13465   | 0.16351   | 0.15339   | 0.23094   | 0.27439    | 0.39983    | 0.16535  | 399    |
| PFDS( $10^{-5}$ ) | 0.10507   | 0.13077   | 0.14623   | 0.14983   | 0.22293   | 0.19493    | 0.25200    | 0.10130  | 468    |
| PRES( $10^{-2}$ ) | 0.10455   | 0.13191   | 0.15511   | 0.15179   | 0.23181   | 0.25037    | 0.36683    | 0.15232  | 500    |
| PRES( $10^{-3}$ ) | 0.10455   | 0.13191   | 0.15511   | 0.15178   | 0.23181   | 0.25037    | 0.36683    | 0.15232  | 500    |
| PRES( $10^{-4}$ ) | 0.10455   | 0.13191   | 0.15511   | 0.15178   | 0.23181   | 0.25037    | 0.36683    | 0.15232  | 500    |
| PRES( $10^{-5}$ ) | 0.10455   | 0.13191   | 0.15511   | 0.15178   | 0.23181   | 0.25037    | 0.36683    | 0.15232  | 500    |
| PL( $10^{-2}$ )   | 0.10460   | 0.13188   | 0.15540   | 0.15165   | 0.23149   | 0.25034    | 0.36606    | 0.15038  | 500    |
| PL( $10^{-3}$ )   | 0.10457   | 0.13183   | 0.15481   | 0.15135   | 0.23043   | 0.23937    | 0.34522    | 0.14130  | 500    |
| PL( $10^{-4}$ )   | 0.10455   | 0.13170   | 0.15462   | 0.15110   | 0.22791   | 0.19425    | 0.25924    | 0.10495  | 499    |
| PL( $10^{-5}$ )   | 0.10454   | 0.13164   | 0.15456   | 0.15100   | 0.22686   | 0.17323    | 0.21870    | 0.08785  | 497    |
| BT( $B = 50$ )    | 0.10440   | 0.13296   | 0.15964   | 0.15611   | 0.23938   | 0.25709    | 0.37621    | 0.15463  | 500    |
| BT( $B = 100$ )   | 0.10426   | 0.13306   | 0.15984   | 0.15772   | 0.24005   | 0.25904    | 0.37680    | 0.15589  | 500    |

Computation Time for the Bootstrap method: 8456s ( $B = 50$ ), 16639s ( $B = 100$ )

Table 3. Simulation results for the additional simulation study in Section A.3.

| $\theta$          | $\beta_1$ | $\beta_2$ | $\beta_3$ | $\beta_4$ | $\beta_5$ | $\gamma_1$ | $\gamma_2$ | $\gamma_3$ | $\gamma_4$ | $\alpha$ | N.     |
|-------------------|-----------|-----------|-----------|-----------|-----------|------------|------------|------------|------------|----------|--------|
| $\theta_0$        | 2.0       | -1.0      | 2.0       | -2.0      | 1.5       | -1.0       | -1.5       | 2          | 1          | 0.5      | Posit. |
| Mean              | 2.0025    | -1.0008   | 1.9916    | -2.0033   | 1.5037    | -1.0403    | -1.4722    | 2.0519     | 0.9829     | 0.5057   |        |
| MCSE              | 0.1072    | 0.0375    | 0.2297    | 0.0904    | 0.1111    | 0.6153     | 0.6622     | 0.4999     | 0.4878     | 0.1137   |        |
| PFDM( $10^{-2}$ ) | 0.1099    | 0.0336    | 0.2925    | 0.0630    | 0.1297    | 0.6434     | 0.6491     | 0.5367     | 0.5061     | 0.1284   | 388    |
| PFDM( $10^{-3}$ ) | 0.0930    | 0.0366    | 0.1276    | 0.1086    | 0.0818    | 0.6332     | 0.6374     | 0.5122     | 0.4392     | 0.1024   | 384    |
| PFDM( $10^{-4}$ ) | 0.0953    | 0.0368    | 0.1365    | 0.1072    | 0.0833    | 0.6364     | 0.6361     | 0.5149     | 0.4427     | 0.1038   | 449    |
| PFDM( $10^{-5}$ ) | 0.0954    | 0.0368    | 0.1380    | 0.1071    | 0.0838    | 0.6365     | 0.6366     | 0.5151     | 0.4434     | 0.1040   | 463    |
| PREM( $10^{-2}$ ) | 0.1022    | 0.0353    | 0.2245    | 0.0903    | 0.1079    | 0.6384     | 0.6417     | 0.5243     | 0.4732     | 0.1158   | 500    |
| PREM( $10^{-3}$ ) | 0.1022    | 0.0353    | 0.2244    | 0.0903    | 0.1079    | 0.6384     | 0.6417     | 0.5244     | 0.4732     | 0.1158   | 500    |
| PREM( $10^{-4}$ ) | 0.1022    | 0.0353    | 0.2244    | 0.0903    | 0.1079    | 0.6384     | 0.6417     | 0.5244     | 0.4732     | 0.1158   | 500    |
| PREM( $10^{-5}$ ) | 0.1022    | 0.0353    | 0.2243    | 0.0903    | 0.1079    | 0.6384     | 0.6417     | 0.5244     | 0.4732     | 0.1158   | 500    |
| PFDS( $10^{-2}$ ) | 0.1022    | 0.0353    | 0.2248    | 0.0902    | 0.1080    | 0.6383     | 0.6419     | 0.5243     | 0.4733     | 0.1159   | 500    |
| PFDS( $10^{-3}$ ) | 0.1032    | 0.0353    | 0.2285    | 0.0900    | 0.1083    | 0.6489     | 0.6628     | 0.5266     | 0.4811     | 0.1195   | 498    |
| PFDS( $10^{-4}$ ) | 0.1003    | 0.0342    | 0.2174    | 0.0879    | 0.1071    | 0.6053     | 0.5646     | 0.5193     | 0.4506     | 0.1090   | 486    |
| PFDS( $10^{-5}$ ) | 0.0999    | 0.0336    | 0.2164    | 0.0868    | 0.1064    | 0.5968     | 0.5546     | 0.5171     | 0.4440     | 0.1088   | 497    |
| PRES( $10^{-2}$ ) | 0.1022    | 0.0353    | 0.2245    | 0.0903    | 0.1079    | 0.6384     | 0.6417     | 0.5243     | 0.4732     | 0.1157   | 500    |
| PRES( $10^{-3}$ ) | 0.1022    | 0.0353    | 0.2244    | 0.0903    | 0.1079    | 0.6384     | 0.6417     | 0.5243     | 0.4732     | 0.1158   | 500    |
| PRES( $10^{-4}$ ) | 0.1022    | 0.0353    | 0.2244    | 0.0903    | 0.1079    | 0.6384     | 0.6419     | 0.5244     | 0.4734     | 0.1158   | 500    |
| PRES( $10^{-5}$ ) | 0.1022    | 0.0353    | 0.2244    | 0.0903    | 0.1079    | 0.6384     | 0.6419     | 0.5244     | 0.4733     | 0.1158   | 500    |
| PL( $10^{-2}$ )   | 0.1022    | 0.0353    | 0.2250    | 0.0903    | 0.1083    | 0.6379     | 0.6410     | 0.5242     | 0.4731     | 0.1159   | 500    |
| PL( $10^{-3}$ )   | 0.1012    | 0.0352    | 0.2237    | 0.0899    | 0.1075    | 0.6211     | 0.6060     | 0.5214     | 0.4611     | 0.1128   | 500    |
| PL( $10^{-4}$ )   | 0.1000    | 0.0351    | 0.2222    | 0.0895    | 0.1067    | 0.5983     | 0.5573     | 0.5173     | 0.4439     | 0.1093   | 500    |
| PL( $10^{-5}$ )   | 0.0999    | 0.0351    | 0.2219    | 0.0894    | 0.1065    | 0.5970     | 0.5548     | 0.5171     | 0.4430     | 0.1092   | 498    |
| BT( $B = 50$ )    | 0.1015    | 0.0348    | 0.2270    | 0.0908    | 0.1092    | 0.6701     | 0.6833     | 0.5505     | 0.5106     | 0.1213   | 500    |
| BT( $B = 100$ )   | 0.1021    | 0.0351    | 0.2271    | 0.0910    | 0.1090    | 0.6750     | 0.6848     | 0.5543     | 0.5126     | 0.1208   | 500    |

Table 4. *Estimates from the EM algorithm for case I in Section 4.1.  $\theta_0$ : true value of the parameters. “Mean” and “MCSE”: empirical means and standard errors of the parameter estimates from the 500 simulations. “CR”: coverage ratios of the 95% confidence interval constructed using the “MCSE” column. “Est. SE: estimated standard errors (for the unspecified baseline hazard, obtained by using PRES with  $h = 10^{-5}$ ; for the piecewise constant and spline-based hazard, obtained from the “JM” package).*

| $\theta$                                         | $\beta_1$ | $\beta_2$ | $\beta_3$ | $\beta_4$ | $\beta_5$ | $\gamma_1$ | $\gamma_2$ | $\alpha$ |
|--------------------------------------------------|-----------|-----------|-----------|-----------|-----------|------------|------------|----------|
| $\theta_0$                                       | -1.0      | -1.5      | 1.0       | -0.5      | 0.5       | -0.5       | 1.5        | 0.5      |
| With Unspecified Baseline Hazard Function        |           |           |           |           |           |            |            |          |
| Mean                                             | -0.99922  | -1.50637  | 1.00145   | -0.50416  | 0.49678   | -0.49800   | 1.54721    | 0.51229  |
| Bias                                             | 0.00078   | 0.00637   | 0.00145   | 0.00416   | 0.00322   | 0.00200    | 0.04721    | 0.01229  |
| MCSE                                             | 0.09939   | 0.11760   | 0.12354   | 0.10917   | 0.18441   | 0.24130    | 0.37139    | 0.13989  |
| CR                                               | 0.942     | 0.950     | 0.952     | 0.958     | 0.940     | 0.948      | 0.940      | 0.950    |
| Est. SE                                          | 0.09527   | 0.11821   | 0.11968   | 0.11482   | 0.18311   | 0.23849    | 0.35264    | 0.13585  |
| With Piecewise Constant Baseline Hazard Function |           |           |           |           |           |            |            |          |
| Mean                                             | -0.99920  | -1.50711  | 1.00316   | -0.50514  | 0.49655   | -0.49118   | 1.56189    | 0.52306  |
| Bias                                             | 0.00080   | 0.00711   | 0.00316   | 0.00514   | 0.00345   | 0.00882    | 0.06189    | 0.02306  |
| MCSE                                             | 0.09942   | 0.11758   | 0.12367   | 0.10918   | 0.18429   | 0.23876    | 0.36891    | 0.13948  |
| CR                                               | 0.942     | 0.950     | 0.952     | 0.958     | 0.940     | 0.950      | 0.944      | 0.948    |
| Est. SE                                          | 0.09527   | 0.11820   | 0.11967   | 0.11481   | 0.18309   | 0.23391    | 0.34903    | 0.13223  |
| With Spline-based Baseline Hazard Function       |           |           |           |           |           |            |            |          |
| Mean                                             | -0.99841  | -1.50683  | 1.00594   | -0.50420  | 0.49653   | -0.49117   | 1.58066    | 0.52803  |
| Bias                                             | 0.00159   | 0.00683   | 0.00594   | 0.00420   | 0.00347   | 0.00883    | 0.08066    | 0.02803  |
| MCSE                                             | 0.09940   | 0.11730   | 0.12325   | 0.10906   | 0.18395   | 0.24321    | 0.37447    | 0.14406  |
| CR                                               | 0.942     | 0.950     | 0.952     | 0.960     | 0.942     | 0.956      | 0.950      | 0.960    |
| Est. SE                                          | 0.09525   | 0.11818   | 0.11976   | 0.11482   | 0.18313   | 0.23821    | 0.35206    | 0.13497  |

Table 5. *Results for the HIV clinical trail data analysis under the model in Appendix A.3. “Est. SE” are the estimated SEs obtained using the PRES method with  $h = 10^{-5}$ .*

| $\theta$   | $\beta_0$ | $\beta_1$ | $\beta_2$ | $\gamma$ | $\alpha$ |
|------------|-----------|-----------|-----------|----------|----------|
| Est. Value | 2.5198    | -0.0417   | 0.0053    | 0.3557   | -1.0749  |
| Est. SE    | 0.04261   | 0.00453   | 0.00635   | 0.15343  | 0.11509  |
| P-value    | < 0.0001  | < 0.0001  | 0.4039    | 0.0204   | < 0.0001 |
